# Supplementary material for: Magnetic anisotropy of CoII–WVferromagnet: single crystal and ab initio study
Source: Royal Society of Chemistry journal article supplement (doi:10.1039/c2ce26387d), 2012-11-19
Supplement: c2ce26387d.pdf [file c2ce26387d.pdf]

# Magnetic anisotropy of Co<sup>II</sup>-W<sup>V</sup> ferromagnet: single crystal and *ab initio* study

Szymon Chorazy, Robert Podgajny\*, Anna M. Majcher, Wojciech Nitek, Michał Rams, Elizaveta

A. Sutura, Liviu Ungur, Liviu F. Chibotaru and Barbara Sieklucka

## Supporting Information

### I. Structural characterization

**Table S1** The selected bond lengths and angles for **1**.

**Fig. S1** The symmetrically independent unit with atom labeling scheme for **1**.

**Table S2** Ideal and observed dihedral  $\delta$  and  $\phi$  angles in  $[\text{W}(\text{CN})_8]^{3-}$  units of **1**.

**Table S3** Results of Continuous Shape Measurements for  $[\text{W}(\text{CN})_8]^{3-}$  units in **1**.

**Table S4** Results of Continuous Shape Measurements for  $[\text{CoN}_2\text{O}_4]^{2+}$  units in **1**.

### II. Magnetic characterization

**Table S5** Magnetic properties of selected  $\text{Co}^{\text{II}}-[\text{W}^{\text{V}}(\text{CN})_8]^{3-}$  magnets.

**Fig. S2** Monocrystalline *ac* characteristics for **1**.

### III. Details of the *ab initio* calculations

**Fig. S3** Structure of the calculated fragment of the **Co3** center.

**Fig. S4** Structure of the calculated fragment of the **Co2** center.

**Table S6** Contractions of the employed basis sets.

**Table S7** Spin-Free Energies (CASSCF) and Spin-Orbit Energies (RASSI) of the **Co2** center ( $\text{cm}^{-1}$ ).

**Fig. S5** Orientation of the main anisotropy axes in the ground Kramers doublet of **Co2** center.

Color scheme: Co - violet, Ta – green, O – red, N – blue, C – grey, H – white.

**Table S8.** Spin-Free Energies (CASSCF) and Spin-Orbit Energies (RASSI) of the **Co3** center ( $\text{cm}^{-1}$ ).

**Fig. S6** Orientation of the main magnetic axes in the ground Kramers doublet of the **Co3** center.

### IV. Magnetic structure simulations.

## I. Structural characterization

**Table S1** The selected bondlengths and angles for **1**.

| Metal centre |              |              | Metal centre |             |           |
|--------------|--------------|--------------|--------------|-------------|-----------|
| W1           | W-C          | 2,154-2,180Å | Co2          | Co-O207     | 2,043(2)Å |
|              | C-N          | 1,140-1,156Å |              | Co-O214     | 2,057(2)Å |
|              | W-C-N        | 173,7-179,8° |              | Co-O21      | 2,070(3)Å |
| Co3          |              |              | Co-O22       | 2,138(3)Å   |           |
|              |              |              | Co-N14       | 2,128(3)Å   |           |
|              | Co-O314      | 2,040(3)Å    | Co-N12       | 2,158(3)Å   |           |
|              | Co-O307      | 2,092(2)Å    |              |             |           |
|              | Co-N13       | 2,102(3)Å    | Co-N12-C12   | 154,5(3)°   |           |
|              |              |              | Co-N14-C14   | 175,8(3)°   |           |
|              | Co-N13-C13   | 178,0(3)°    |              |             |           |
|              | N13-Co-N13   | 180,0(2)°    | O207-Co-O214 | 86.20(9)°   |           |
|              | O314-Co-O314 | 180,0(2)°    | O207-Co-O21  | 92.52(10)°  |           |
|              | O307-Co-O307 | 180,0(2)°    | O214-Co-O21  | 178.72(11)° |           |
|              |              |              | O207-Co-N14  | 95.48(10)°  |           |
|              | N13-Co-O314  | 92,83(11)°   | O214-Co-N14  | 86.72(11)°  |           |
|              |              | 87,17(11)°   | O21-Co-N14   | 93.48(11)°  |           |
|              | O314-Co-O307 | 94,39(10)°   | O207-Co-O22  | 174.19(10)° |           |
|              |              | 85,61(10)°   | O214-Co-O22  | 91.55(11)°  |           |
|              | O307-Co-N13  | 95,64(10)°   | O21-Co-O22   | 89.71(12)°  |           |
|              |              | 84,36(10)°   | N14-Co-O22   | 89.74(11)°  |           |
|              |              |              | O207-Co-N12  | 89.66(10)°  |           |
|              |              |              | O214-Co-N12  | 93.87(11)°  |           |
|              |              |              | O21-Co-N12   | 86.04(11)°  |           |
|              |              | N14-Co-N12   | 174.86(11)°  |             |           |
|              |              | O22-Co-N12   | 85.14(11)°   |             |           |

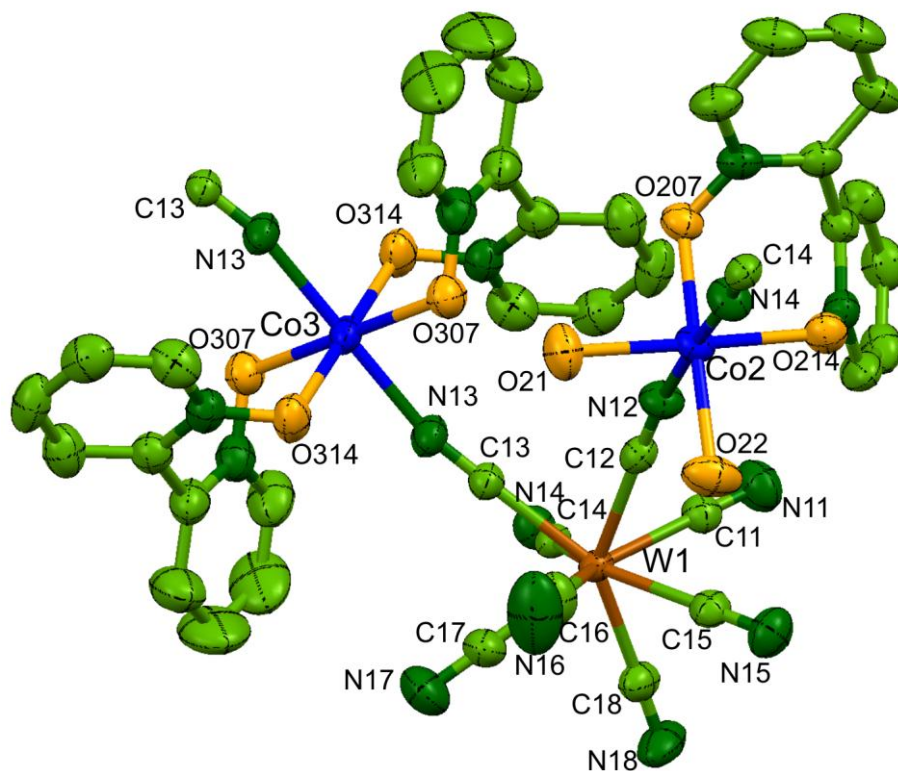

**Fig. S1** The symmetrically independent unit with atom labeling scheme for **1**. Colors: Co(II) (dark blue), W(V) (brown), carbon atoms (green), nitrogen atoms (dark green), oxygen atoms (yellow). Hydrogen atoms and crystalline water molecules are omitted for clarity. Displacement ellipsoids are drawn at a 60% probability level.

**Table S2** Ideal and observed dihedral  $\delta$  and  $\phi$  angles in  $[\text{W}(\text{CN})_8]^{3-}$  units of **1**.<sup>S1</sup>

| Complex                         | $\delta$ [°]           | $\phi$ [°]  |
|---------------------------------|------------------------|-------------|
| Ideal DD-8                      | 29.5; 29.5; 29.5; 29.5 | 0           |
| Ideal BTP-8                     | 0; 21.8; 48.2; 48.2    | 14.1        |
| Ideal SAPR-8                    | 0; 0; 52.4; 52.4       | 24.5        |
| $[\text{W1}(\text{CN})_8]^{3-}$ | 0.4; 12.1; 47.9; 48.7  | 21.0 – 23.0 |

- S1 (a) E. L. Muetterties and L. J. Guggenberger, *J. Am. Chem. Soc.*, 1974, **96**, 1748-1756; (b) D. Visinescu, C. Desplanches, I. Imaz, V. Bahers, R. Pradhan, F. A. Villamen, P. Guionneau and J.-P. Sutter, *J. Am. Chem. Soc.*, 2006, **128**, 10202-10212.

**Table S3** Results of Continuous Shape Measurements for  $[\text{W}(\text{CN})_8]^{3-}$  units in **1**.<sup>S2</sup>

|                | $[\text{W}(\text{CN})_8]^{3-}$ |
|----------------|--------------------------------|
| CSM SAPR-8     | 0.269                          |
| CSM DD-8       | 1.905                          |
| CSM BTP-8      | 1.508                          |
| BTP-8 → SAPR-8 |                                |
| DevPath        | 15.9                           |
| GenCoord       | 81.6                           |
| SAPR-8 → BTP-8 |                                |
| GenCoord       | 34.3                           |
| BTP-8 → DD-8   |                                |
| DevPath        | 58.2                           |
| GenCoord       | 74.5                           |
| DD-8 → BTP-8   |                                |
| GenCoord       | 83.7                           |
| SAPR-8 → DD-8  |                                |
| DevPath        | 12.2                           |
| GenCoord       | 30.6                           |
| DD-8 → SAPR-8  |                                |
| GenCoord       | 81.7                           |

**CSM** represent the shape measure relative to the relevant polyhedra: SAPR-8 for the square antiprism, DD-8 for the triangular dodecahedron and BTP-8 for the square face bicapped trigonal prism. Generally, the value of **CSM** is zero, when the analyzed polyhedron exhibits exactly the reference geometry and increases with the degree of distortion. **DevPath** for two polyhedral represents the deviation from the idealized interconversion path between the pair of polyhedra, while **GenCoord** is generalized interconversion coordinates showing the degree of conversion between these polyhedra. The presented set of parameters indicate the dominating SAPR-8 shape of  $[\text{W}(\text{CN})_8]^{3-}$  in **1**.

S2 M. Llunell, D. Casanova, J. Cirera, M. P. Alemany and S. Alvarez, SHAPE, v. 2.0; Program for the Stereochemical Analysis of Molecular Fragments by Means of Continuous Shape Measures and Associated Tools; Departament de Química Física, Departament de Química Inorganica, and Institut de Química Teorica i Computacional, Universitat de Barcelona: Barcelona, Spain, 2010.

**Table S4** Results of Continuous Shape Measurements for  $[\text{CoN}_2\text{O}_4]^{2+}$  units in **1**<sup>S2</sup>

|            | $[\text{Co}_2\text{N}_2\text{O}_4]^{2+}$ | $[\text{Co}_3\text{N}_2\text{O}_4]^{2+}$ |
|------------|------------------------------------------|------------------------------------------|
| CSM HP-6   | 31.160                                   | 28.374                                   |
| CSM PPY-6  | 27.023                                   | 27.921                                   |
| CSM OC-6   | 0.228                                    | 0.327                                    |
| CSM TPR-6  | 14.635                                   | 16.155                                   |
| CSM JPPY-5 | 30.428                                   | 31.005                                   |

## II. Magnetic characterization

**Table S5** Magnetic properties of selected samples  $\text{Co}^{\text{II}}\text{-}[\text{W}^{\text{V}}(\text{CN})_8]^{3-}$  magnets.

| Chemical Formula                                                                                                                                                                                    | $T_{\text{C}}$<br>[K] | $M_{\text{S}}$ [ $\mu_{\text{B}}$ ] | Hysteresis loop<br>( $H_{\text{C}}$ , [Oe]) | Ref.         |
|-----------------------------------------------------------------------------------------------------------------------------------------------------------------------------------------------------|-----------------------|-------------------------------------|---------------------------------------------|--------------|
| $[\text{Co}^{\text{II}}_3(\text{DMF})_{12}][\text{W}^{\text{V}}(\text{CN})_8]_2$                                                                                                                    | 7.3                   | 10.85                               | 900                                         | S3           |
| $\{\text{Co}^{\text{II}}_3(\text{H}_2\text{O})_6(\text{pyz})_3[\text{W}^{\text{V}}(\text{CN})_8]_2\} \cdot 3,5\text{H}_2\text{O}$                                                                   | 26                    | 8.43                                | 750                                         | S4           |
| $\{\text{Co}^{\text{II}}_3(\text{H}_2\text{O})_4(4,4'\text{-bpy})_3$<br>$[\text{W}^{\text{V}}(\text{CN})_8]_2\} \cdot 1,5(4,4'\text{-bpy}) \cdot 6\text{H}_2\text{O}$                               | 16                    | 8.17                                | 1200                                        | S4           |
| $([\{\text{Co}^{\text{II}}(\text{pym})_2\}_2\{\text{Co}^{\text{II}}(\text{H}_2\text{O})_2\}\{\text{W}^{\text{V}}(\text{CN})_8\}_2])$<br>$\cdot 4\text{H}_2\text{O}$                                 | 32                    | 8.0                                 | 12000 <sup>a</sup>                          | S5           |
| $\{[\text{Co}^{\text{II}}(\text{H}_2\text{O})_2]_3[\text{W}^{\text{V}}(\text{CN})_8]_2\} \cdot 4\text{H}_2\text{O}$                                                                                 | 18                    | 8.1                                 | 600                                         | S6           |
| $\{\text{Co}^{\text{II}}(\text{pyr})_4\}_2[\text{Nb}^{\text{IV}}(\text{CN})_8] \cdot 4\text{H}_2\text{O}^b$                                                                                         | 5.9                   | 5.55                                | 80                                          | S7           |
| $[\{\text{Co}^{\text{II}}(2,2'\text{-bpdo})_2\}\{\text{Co}^{\text{II}}(2,2'\text{-bpdo})$<br>$(\text{H}_2\text{O})_2\}_2\{\text{W}^{\text{V}}(\text{CN})_8\}_3] \cdot 8\text{H}_2\text{O}$ <b>1</b> | 6.0                   | 8.72                                | 100 <sup>c</sup>                            | this<br>work |

<sup>a</sup>The value observed for metastable state after irradiation at low in SQUID cavity. <sup>b</sup> $M_{\text{S}}$  value corresponds to  $\text{Co}^{\text{II}}_2\text{Nb}^{\text{IV}}$  composition. <sup>c</sup>The value for monocrystalline sample.

## References

- S3 D. Li, L. Zheng, Y. Zhang, J. Huang, S. Gao and W. Tang, *Inorg. Chem.*, 2003, **42**, 6123–6129.
- S4 R. Podgajny, M. Bałanda, M. Sikora, M. Borowiec, L. Spalek, C. Kapusta and B. Sieklucka, *Dalton Trans.*, 2006, 2801–2809.
- S5 S. Ohkoshi, Y. Hamada, T. Matsuda, Y. Tsunobuchi and H. Tokoro, *Chem. Mater.*, 2008, **20**, 3048–3054.
- S6 J. M. Herrera, A. Bleuzen, Y. Dromzee, M. Julve, F. Lloret and M. Verdaguer, *Inorg. Chem.*, 2003, **42**, 7052–7059.
- S7 D. Pinkowicz, R. Pełka, O. Drath, W. Nitek, M. Bałanda, A. M. Majcher, G. Poneti and B. Sieklucka, *Inorg. Chem.*, 2010, **49**, 7565–7576.

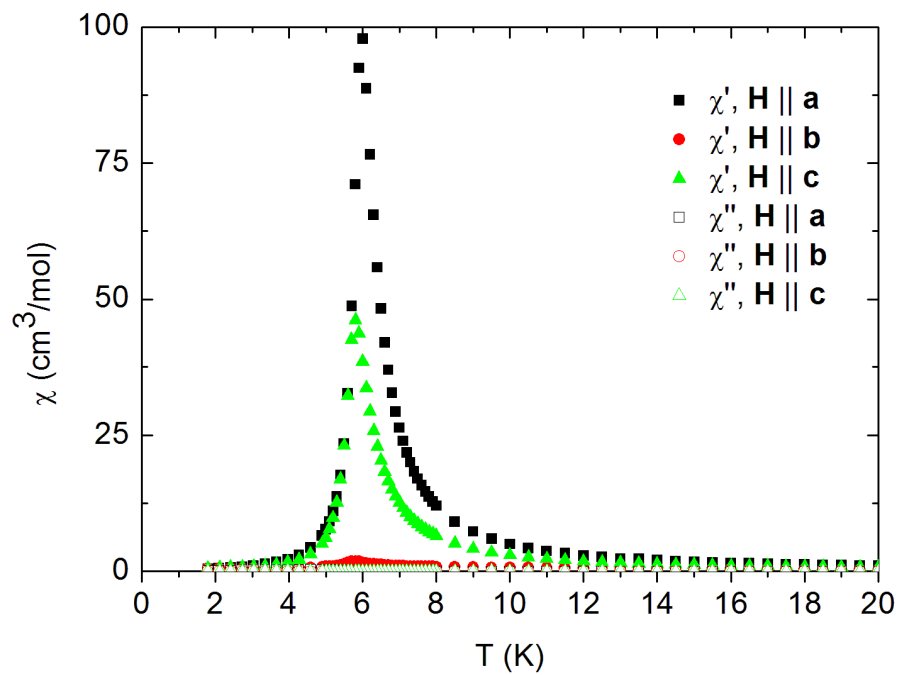

**Fig. S2** Monocrystalline *ac* characteristics for **1**.



### III. Details of the *ab initio* calculations

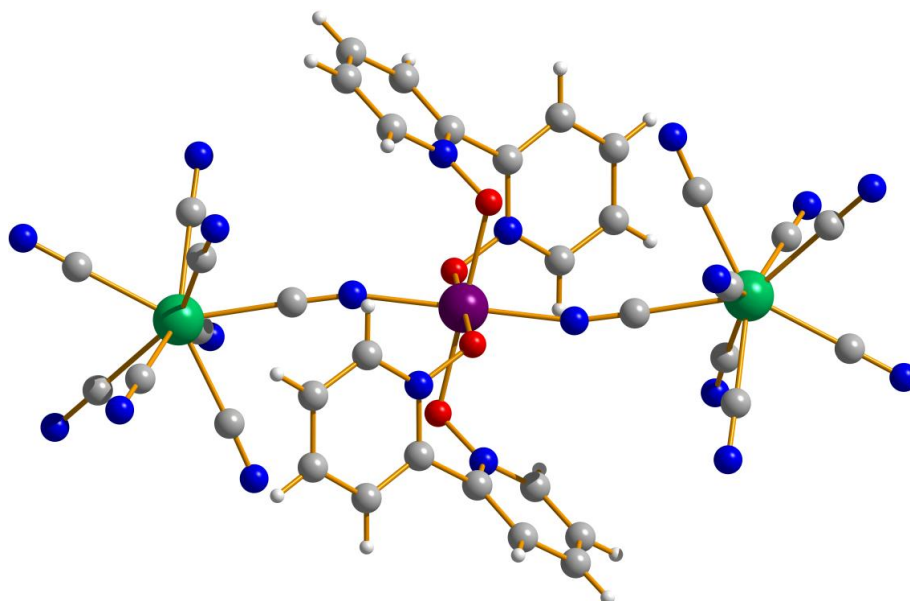

**Fig. S3** Structure of the calculated fragment of the Co3 center. Color scheme: Co - violet, Ta – green, O – red, N – blue, C – grey, H – white.

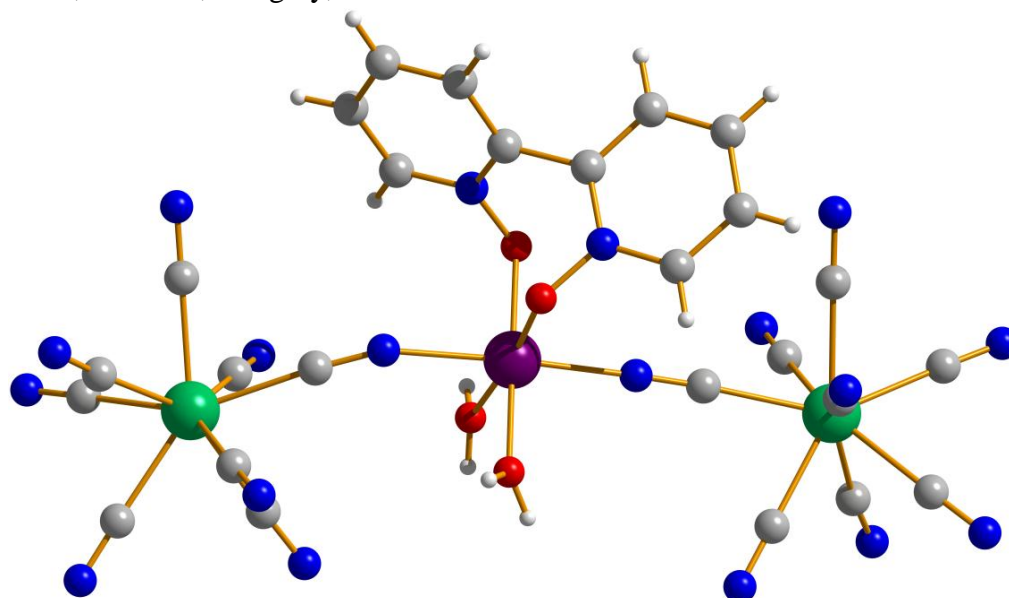

**Fig. S4** Structure of the calculated fragment of the Co2 center. Color scheme: Co - violet, Ta – green, O – red, N – blue, C – grey, H – white.

**Table S6** Contractions of the employed basis sets.

| Basis Sets                  |
|-----------------------------|
| Co.ANO-RCC...5s4p2d1f.      |
| Ta.ANO-DK3...6s4p3d1f.      |
| O.ANO-RCC...3s2p.           |
| N.ANO-RCC...3s2p. (close)   |
| N.ANO-DK3...2s1p. (distant) |
| C.ANO-DK3...2s1p.           |
| H. ANO-DK3...1s.            |

**Table S7** Spin-Free Energies (CASSCF) and Spin-Orbit Energies (RASSI) of the **Co2** center ( $\text{cm}^{-1}$ ).

| 2S+1                     | AS1             | AS2             | AS1       | AS2       |
|--------------------------|-----------------|-----------------|-----------|-----------|
|                          | CASSCF          | CASSCF          | RASSI     | RASSI     |
| <b><math>4T_1</math></b> | <b>0.000</b>    | <b>0.000</b>    | 0.000     | 0.000     |
|                          | <b>509.060</b>  | <b>538.200</b>  | 172.535   | 150.650   |
|                          | <b>1141.882</b> | <b>1238.648</b> | 705.107   | 712.364   |
|                          | 6607.384        | 7120.222        | 993.822   | 963.345   |
|                          | 7144.949        | 7693.471        | 1493.650  | 1540.474  |
|                          | 7292.876        | 7896.132        | 1601.691  | 1640.099  |
|                          | 14608.501       | 15665.396       | 6909.480  | 7381.233  |
|                          | 23224.478       | 22268.955       | 6966.507  | 7430.301  |
|                          | 24220.331       | 23298.288       | 7436.171  | 7948.157  |
|                          | 24723.670       | 23842.317       | 7480.133  | 7988.704  |
| <b>doublets</b>          | 14699.648       | 13914.583       | 7625.347  | 8178.680  |
|                          | 15646.319       | 14906.217       | 7738.914  | 8275.060  |
|                          | 20072.846       | 19818.454       | 14976.851 | 14191.439 |
|                          | 20174.452       | 19931.014       | 14982.279 | 15179.631 |
|                          | 20436.026       | 20270.061       | 15017.289 | 15984.425 |
|                          | 20608.432       | 20462.483       | 15954.990 | 15987.658 |
|                          | 20882.162       | 20736.102       | 20191.237 | 19920.444 |
|                          | 21162.674       | 21101.005       | 20436.676 | 20190.148 |
|                          | 25093.245       | 25420.638       | 20791.032 | 20571.940 |
|                          | 25951.915       | 25607.151       | 21069.025 | 20841.838 |
|                          | 26187.419       | 25853.845       | 21353.775 | 21151.655 |
|                          | 26346.667       | 26038.002       | 21622.531 | 21502.899 |
|                          | 28737.741       | 28570.202       | 23390.158 | 22429.858 |
|                          | 29119.740       | 28956.857       | 23458.026 | 22482.604 |
|                          | 29360.848       | 29227.056       | 24339.762 | 23422.304 |
|                          | 29669.432       | 29587.486       | 24437.085 | 23499.094 |
|                          | 29809.839       | 29743.590       | 24789.997 | 23936.585 |
|                          | 30082.911       | 30012.460       | 25067.269 | 24152.012 |
|                          | 31688.222       | 31558.594       | 25323.620 | 25524.725 |
|                          | 32150.701       | 32062.752       | 26502.353 | 26070.689 |
|                          | 34593.899       | 34586.920       | 26679.251 | 26259.485 |
|                          | 34679.544       | 34762.282       | 27132.584 | 26788.256 |
|                          | 34840.389       | 34886.694       | 29100.721 | 28899.119 |
|                          | 35269.751       | 35476.780       | 29513.838 | 29303.881 |
|                          | 35734.261       | 35929.319       | 29801.041 | 29619.874 |
|                          | ...             | ...             | ...       | ...       |

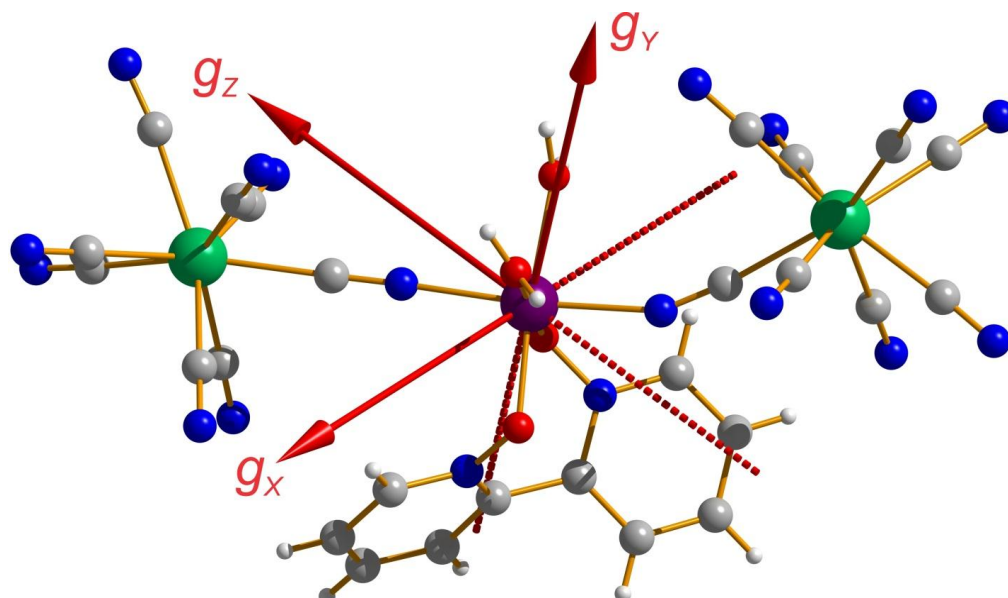

**Fig. S5** Orientation of the main anisotropy axes in the ground Kramers doublet of **Co2** center. Color scheme: Co - violet, Ta – green, O – red, N – blue, C – grey, H – white.

**Table S8** Spin-Free Energies (CASSCF) and Spin-Orbit Energies (RASSI) of the **Co3** center ( $\text{cm}^{-1}$ ).

| 2S+1            |           | AS1             | AS2             | AS1       | AS2       |
|-----------------|-----------|-----------------|-----------------|-----------|-----------|
|                 |           | CASSCF          | CASSCF          | RASSI     | RASSI     |
| <b>quartets</b> | $4T_1$    | <b>0.000</b>    | <b>0.000</b>    | 0.000     | 0.000     |
|                 |           | <b>997.252</b>  | <b>1082.055</b> | 112.973   | 93.294    |
|                 |           | <b>1140.962</b> | <b>1227.046</b> | 985.384   | 1045.174  |
|                 |           | 6481.762        | 6914.014        | 1275.686  | 1307.809  |
|                 |           | 7189.815        | 7660.856        | 1466.810  | 1504.869  |
|                 |           | 8309.674        | 8981.533        | 1631.697  | 1667.709  |
|                 |           | 15062.204       | 16054.375       | 6710.107  | 7103.602  |
|                 |           | 23494.830       | 22496.560       | 6786.461  | 7169.767  |
|                 |           | 24192.691       | 23223.194       | 7413.302  | 7846.147  |
|                 | 25204.265 | 24320.165       | 7485.935        | 7911.628  |           |
| <b>doublets</b> |           | 14168.000       | 13355.852       | 8529.857  | 9161.587  |
|                 |           | 15830.199       | 15145.182       | 8622.825  | 9242.489  |
|                 |           | 19516.804       | 19192.678       | 14402.695 | 13559.406 |
|                 |           | 20113.694       | 19862.371       | 15352.467 | 15344.156 |
|                 |           | 20439.026       | 20211.966       | 15357.403 | 16294.342 |
|                 |           | 20673.954       | 20419.057       | 16062.026 | 16299.139 |
|                 |           | 21034.814       | 20907.101       | 19749.957 | 19400.473 |
|                 |           | 21442.064       | 21464.526       | 20258.194 | 19985.255 |
|                 |           | 25275.066       | 25403.907       | 20622.849 | 20356.199 |
|                 |           | 25788.883       | 25557.216       | 21023.212 | 20727.792 |
|                 |           | 26061.007       | 25706.927       | 21399.445 | 21217.420 |
|                 |           | 26264.691       | 25910.254       | 21828.935 | 21784.599 |
|                 |           | 28930.118       | 28715.736       | 23566.723 | 22574.727 |
|                 |           | 29249.373       | 29037.952       | 23638.297 | 22627.062 |
|                 |           | 29411.860       | 29218.640       | 24230.080 | 23272.833 |
|                 | 29922.075 | 29843.781       | 24378.854       | 23389.452 |           |
|                 | 30214.171 | 30120.246       | 25084.426       | 24276.523 |           |

|           |           |           |           |
|-----------|-----------|-----------|-----------|
| 30728.819 | 30744.325 | 25356.400 | 24503.302 |
| 32108.746 | 31965.053 | 25448.290 | 25517.489 |
| 32271.801 | 32174.320 | 26338.388 | 25836.148 |
| 34833.411 | 34798.084 | 26615.819 | 26155.683 |
| 34973.433 | 34971.559 | 26949.127 | 26593.953 |
| 35247.288 | 35229.155 | 29171.825 | 28920.525 |
| 35633.236 | 35792.050 | 29596.889 | 29361.415 |
| 35740.103 | 35938.887 | 29717.021 | 29476.507 |
| ...       | ...       | ...       | ...       |

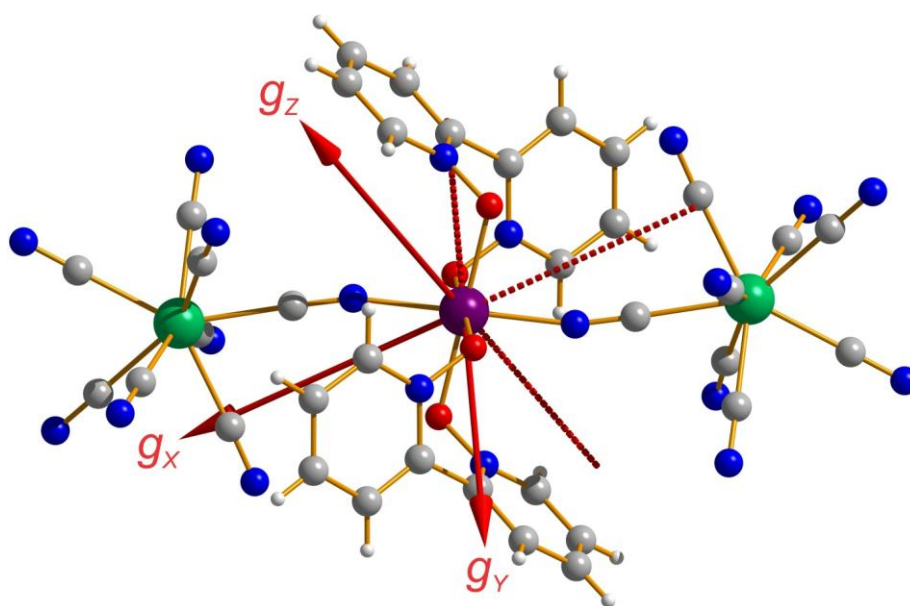

**Fig. S6** Orientation of the main magnetic axes in the ground Kramers doublet of the **Co3** center. Color scheme: Co - violet, Ta – green, O – red, N – blue, C – grey, H – white.

#### IV. Magnetic structure simulations

Magnetic structure was simulated using molecular field approach. The energy of the  $\text{Co}_6\text{W}_4$  unit

$$E = -2\vec{m}_W \vec{h}_W - 2\vec{m}_{W'} \vec{h}_{W'} - 2\vec{m}_{\text{Co}2} \vec{h}_{\text{Co}2} - 2\vec{m}_{\text{Co}2'} \vec{h}_{\text{Co}2'} - \vec{m}_{\text{Co}3} \vec{h}_{\text{Co}3} - \vec{m}_{\text{Co}3'} \vec{h}_{\text{Co}3'}$$

was minimized. It takes into account two different orientations of Co3 ions, and two different orientations of Co2 ions in the elementary cell. The molecular field

$$\vec{h}_W = \lambda(\vec{m}_{\text{Co}2} + \vec{m}_{\text{Co}2'} + \vec{m}_{\text{Co}3'})$$

$$\vec{h}_{W'} = \lambda(\vec{m}_{\text{Co}2} + \vec{m}_{\text{Co}2'} + \vec{m}_{\text{Co}3})$$

$$\vec{h}_{\text{Co}2} = h_{\text{Co}2} = \lambda(\vec{m}_W + \vec{m}_{W'})$$

$$\vec{h}_{\text{Co}3} = 2\lambda\vec{m}_{W'}$$

$$\vec{h}_{\text{Co}3'} = 2\lambda\vec{m}_W$$

is calculated assuming the same exchange interaction for all Co-W pairs. Two sublattices for W ions is taken into account, because of their Co3 or Co3' neighborhood.

Magnetic moments in the saturation limit (ground state at  $T = 0$ ) are

$$\vec{m}_W = \frac{1}{2} 2 \frac{\vec{h}_W}{h_W}$$

$$\vec{m}_{\text{Co}3} = \frac{1}{2} \hat{R}_{\text{Co}3} \hat{g}_{\text{Co}3} \hat{R}_{\text{Co}3}^{-1} \frac{\vec{h}_{\text{Co}3}}{h_{\text{Co}3}}$$

etc.

where  $R$  are rotation matrices of local axes of Co  $g$ -tensors. Isotropic  $g$ -tensors for W ions with  $g=2.0$  were used. From *ab initio* calculations

$$\hat{R}_{\text{Co}3} = \begin{pmatrix} -0.330 & -0.447 & 0.824 \\ 0.912 & 0.077 & 0.423 \\ -0.245 & 0.891 & 0.377 \end{pmatrix} \quad \hat{R}_{\text{Co}2} = \begin{pmatrix} 0.488 & 0.310 & -0.805 \\ -0.853 & -0.031 & -0.540 \\ -0.187 & 0.950 & 0.245 \end{pmatrix}$$

and  $g_{\text{Co}2} = (2.061, 2.950, 7.301)$ ,  $g_{\text{Co}3} = (5.396, 4.819, 2.283)$ .  $R$  for Co2 and Co3' are reflected in  $ac$  plane.

These equations are easily solvable (using Mathematica software) after parametrization

$$\frac{\vec{h}_W}{h_W} = (\cos \varphi_W \sin \theta_W, \sin \varphi_W \sin \theta_W, \cos \theta_W)$$

$$\frac{\vec{h}_{W'}}{h_{W'}} = (\cos \varphi_{W'} \sin \theta_{W'}, \sin \varphi_{W'} \sin \theta_{W'}, \cos \theta_{W'})$$

where  $\theta_W \dots \varphi_{W'}$  are four free parameters. The resulting values and orientations of magnetic moments does not depend on the  $\lambda$  molecular field constant; during simulation  $\lambda=1$  was used.

The magnetization energy has the minimum for  $\varphi_W = 0.073$ ,  $\varphi_{W'} = -0.073$ , and  $\theta_W = 1.118$ , and  $\theta_{W'} = 1.118$ .

Magnetic moments are then equal (  $x \parallel a$ ,  $y \parallel b^*$ ,  $z \parallel c$  )

|                                | $M_x / \mu_B$ | $M_y / \mu_B$ | $M_z / \mu_B$ |
|--------------------------------|---------------|---------------|---------------|
| W                              | -0.90         | -0.07         | 0.43          |
| W'                             | -0.90         | 0.07          | 0.43          |
| Co3                            | -1.61         | 0.52          | 1.30          |
| Co3'                           | -1.61         | -0.52         | 1.30          |
| Co2                            | -2.68         | -1.19         | 1.05          |
| Co2'                           | -2.68         | 1.19          | 1.05          |
| Total/ $\text{Co}_3\text{W}_2$ | -8.76         | 0.0           | 4.28          |

Total magnetization of the crystal along axes:  $M_a = -8.76$ ,  $M_{b^*} = 0.0$ ,  $M_c = 4.28 \mu_B$  per  $\text{Co}_3\text{W}_2$  unit. The magnetization cancels along the  $b^* \approx b$  direction, which is consistent with the experimental data. It should be stressed that this result was obtained without imposing the crystal glide plane symmetry on the solution (e.g. independent variables for  $\varphi_W$  and  $-\varphi_{W'}$  were used in minimization of energy). However, the glide plane symmetry is preserved in this case. The spontaneous magnetization is  $9.75 \mu_B$ , within the  $ac$  plane, creating  $26^\circ$  from the  $a$  crystallographic axis.
